# Supplementary material for: Leukocyte redistribution as immunological biomarker of corticosteroid resistance in severe asthma
Source: PubMed Central journal article supplement (PMC9790739; doi:10.1111/cea.14128), 2022-04-01
Supplement: CEA-52-1183-s001.pdf [file CEA-52-1183-s001.pdf]

# Supplementary Figure 1

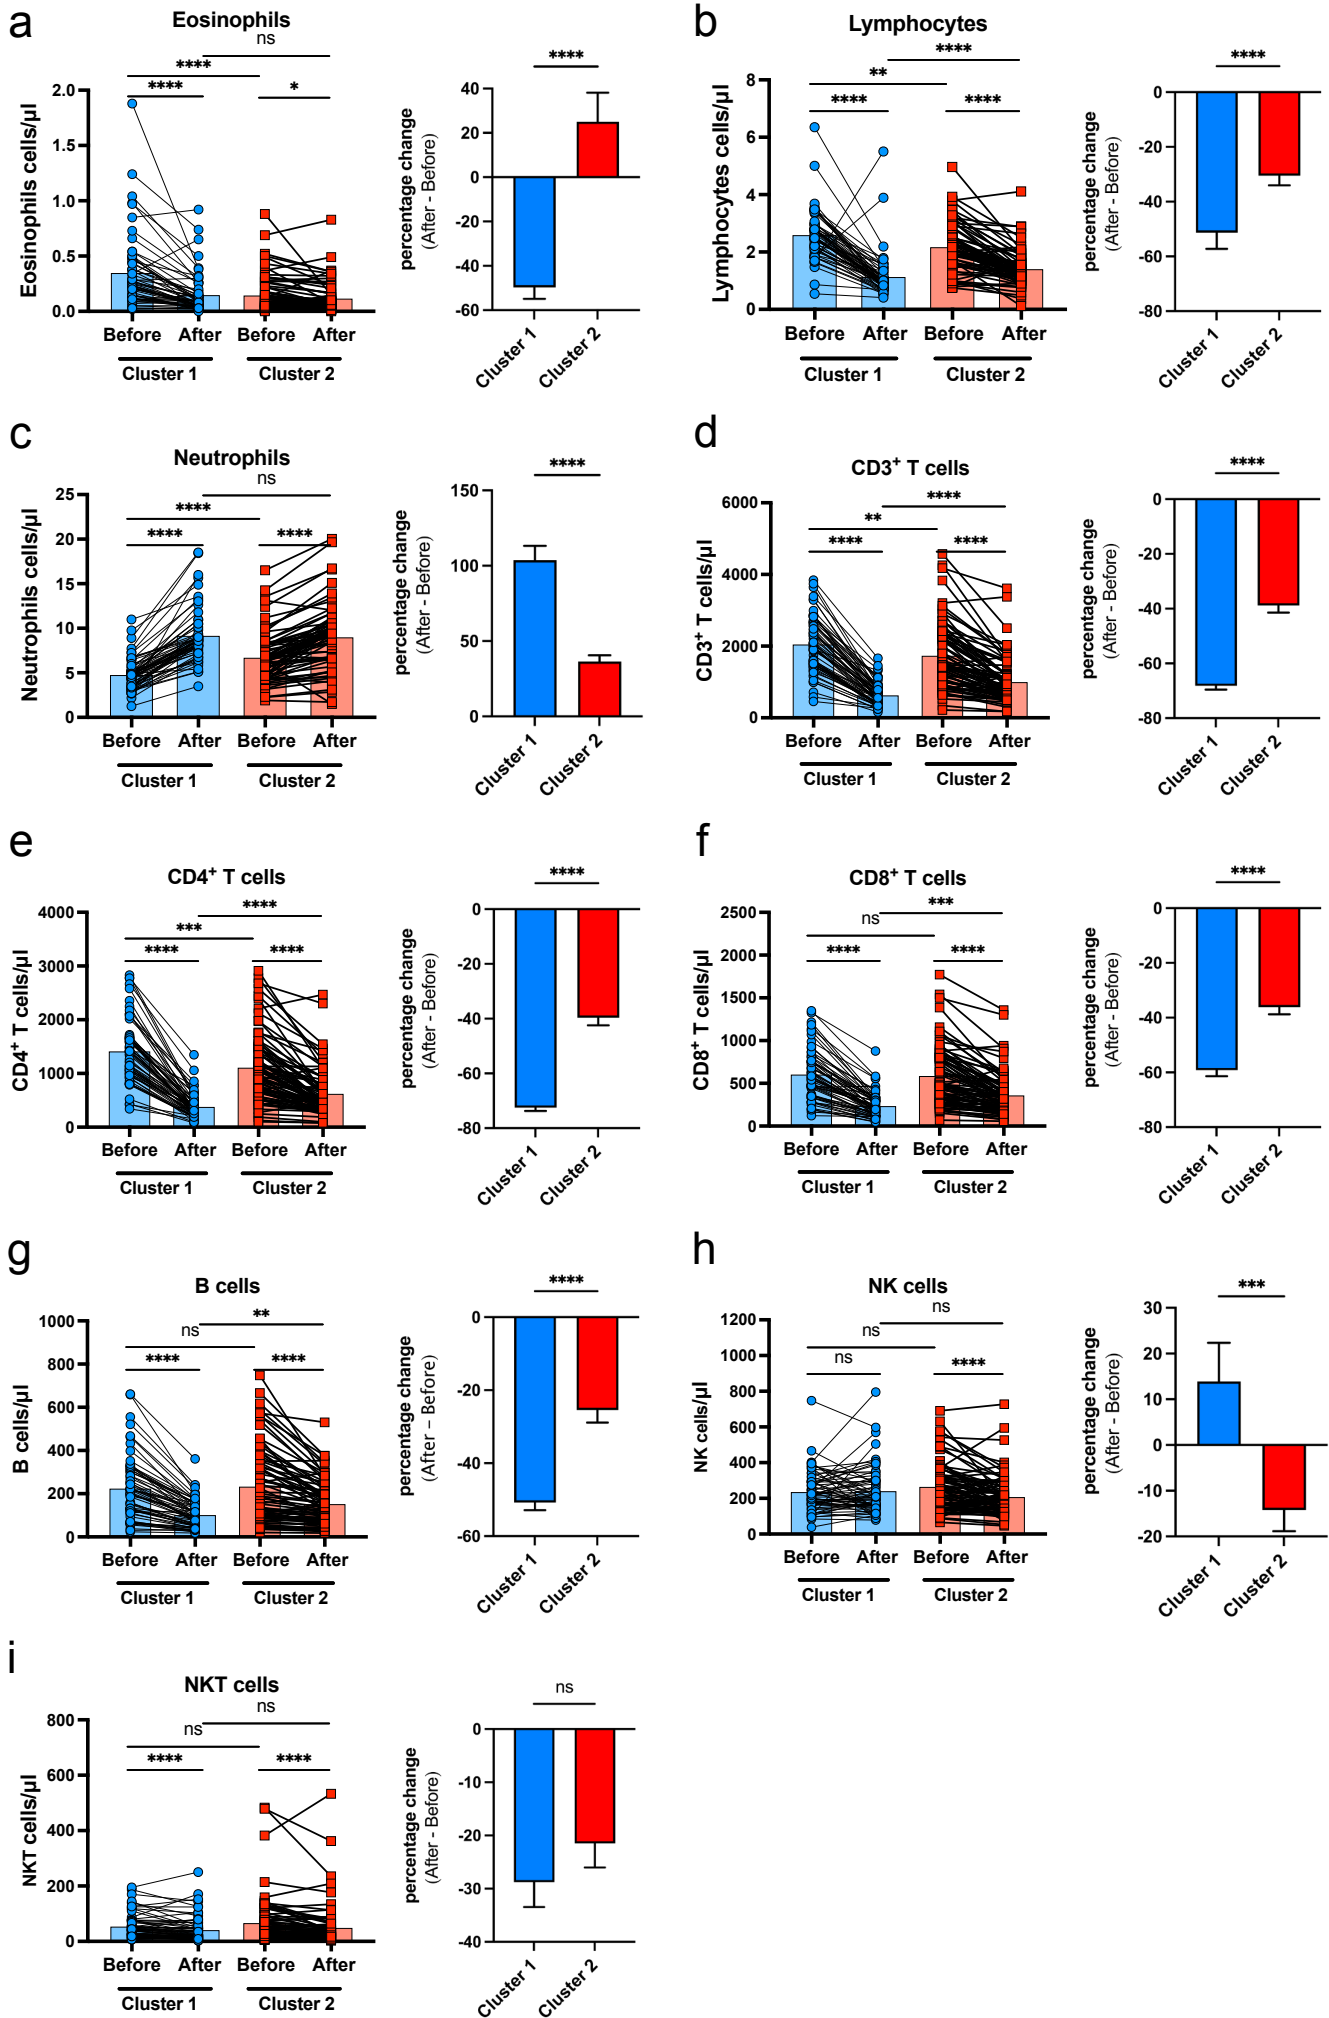

**Supplementary Fig.1 Cluster 1 and 2 patients with severe asthma differ at baseline in the absolute numbers of eosinophils, lymphocytes, neutrophils, CD3<sup>+</sup> T cells and CD4<sup>+</sup> T cells, as well as in the response of several cellular populations to intravenous corticosteroids administration.** For both patient clusters, the absolute number before and after the intravenous administration of CS and the corresponding percentage change are shown for eosinophils **(a)**, lymphocytes **(b)**, neutrophils **(c)**, CD3<sup>+</sup> T cells **(d)**, CD4<sup>+</sup> T cells **(e)**, CD8<sup>+</sup> T cells **(f)**, B cells **(g)**, NK cells **(h)**, NKT cells **(i)**. The difference between paired samples was analyzed with the Wilcoxon signed rank test and the difference between groups with the Mann-Whitney test. \*\*: p<0.01, \*\*\*: p<0.001, \*\*\*\*: p<0.0001, ns: not significant. Dots represent individual patients. Bars represent the mean values. Percentage changes are reported as means ± SEM.
